# Supplementary material for: Reaction of a Co(iii)-peroxo complex with nitric oxide: putative formation of a peroxynitrite intermediate
Source: Royal Society of Chemistry journal article supplement (doi:10.1039/d3dt02261g), 2023-01-01
Supplement: d3dt02261g1.pdf [file d3dt02261g1.pdf]

## Supporting Information

for

### Reaction of a Co(III)-peroxo Complex with Nitric Oxide: Putative Formation of a Peroxynitrite Intermediate

Bapan Samanta, Riya Ghosh, Rakesh Mazumdar, Shankhadeep Saha, Sayani Maity, Biplab Mondal\*

Department of Chemistry, Indian Institute of Technology Guwahati, Assam 781039, India. Phone: (+)91-361-2582317. Fax: (+)91-361-2582337. Email: biplab@iitg.ac.in.

#### Table of contents

| Sl. No. | Description                                                                                                                                          | Page No. |
|---------|------------------------------------------------------------------------------------------------------------------------------------------------------|----------|
| 1       | <b>Figure S1.</b> FT-IR spectrum of <b>L</b> in KBr.                                                                                                 | S3       |
| 2       | <b>Figure S2.</b> <sup>1</sup> H NMR spectrum of <b>L</b> in CDCl <sub>3</sub> .                                                                     | S3       |
| 3       | <b>Figure S3.</b> <sup>13</sup> C NMR spectrum of <b>L</b> in CDCl <sub>3</sub> .                                                                    | S4       |
| 4       | <b>Figure S4.</b> ESI-mass spectrum of <b>L</b> in acetonitrile.                                                                                     | S4       |
| 5       | <b>Figure S5.</b> FT-IR spectrum of complex <b>1</b> in KBr.                                                                                         | S5       |
| 6       | <b>Figure S6.</b> UV-visible spectrum of complex <b>1</b> in acetonitrile at room temperature.                                                       | S5       |
| 7       | <b>Figure S7.</b> ESI-mass spectrum of complex <b>1</b> in acetonitrile. [Inset: (a) experimental and (b) simulated isotopic distribution pattern].  | S6       |
| 8       | <b>Figure S8.</b> X-band EPR spectrum of complex <b>1</b> in acetonitrile at 77K.                                                                    | S6       |
| 9       | <b>Figure S9.</b> FT-IR spectrum of complex <b>2</b> in KBr.                                                                                         | S7       |
| 10      | <b>Figure S10.</b> UV-visible spectrum of complex <b>2</b> in acetonitrile at room temperature.                                                      | S7       |
| 11      | <b>Figure S11.</b> ESI-mass spectrum of complex <b>2</b> in acetonitrile.                                                                            | S8       |
| 12      | <b>Figure S12.</b> FT-IR spectrum of complex <b>3</b> in KBr.                                                                                        | S8       |
| 13      | <b>Figure S13.</b> UV-visible spectrum of complex <b>3</b> in acetonitrile at room temperature.                                                      | S9       |
| 14      | <b>Figure S14.</b> ESI-mass spectrum of complex <b>3</b> in acetonitrile. [Inset: (a) experimental and (b) simulated isotopic distribution pattern]. | S9       |
| 15      | <b>Figure S15.</b> X-band EPR spectrum of complex <b>3</b> in acetonitrile at 77K.                                                                   | S10      |
| 16      | <b>Figure S16.</b> FT-IR spectrum of complex <b>2,4-di-tert-butyl-6-nitrophenol</b> .                                                                | S10      |
| 17      | <b>Figure S17.</b> <sup>1</sup> H NMR spectrum of <b>2,4-di-tert-butyl-6-nitrophenol</b> in CDCl <sub>3</sub> .                                      | S11      |
| 18      | <b>Figure S18.</b> <sup>13</sup> C NMR spectrum of <b>2,4-di-tert-butyl-6-nitrophenol</b> in CDCl <sub>3</sub> .                                     | S11      |
| 19      | <b>Figure S19.</b> ESI-mass spectrum of <b>2,4-di-tert-butyl-6-nitrophenol</b> in acetonitrile.                                                      | S12      |
| 20      | <b>Figure S20.</b> X-band EPR spectrum of <b>Cobalt(II)-hydroxide complex</b> in acetonitrile at 77K.                                                | S12      |
| 21      | <b>Figure 21.</b> PXRD patterns of complex <b>1</b> . [Experimental (red) and Simulated                                                              | S13      |

|    |                                                                                                   |             |
|----|---------------------------------------------------------------------------------------------------|-------------|
|    | (black)]                                                                                          |             |
| 22 | <b>Figure 22.</b> PXRD patterns of complex <b>2</b> . [Experimental (red) and Simulated (black)]. | S13         |
| 23 | <b>Table A1:</b> Crystallographic data for complexes <b>1</b> and <b>2</b> .                      | S14         |
| 24 | <b>Table A2:</b> Selected bond lengths (Å) of complexes <b>1</b> and <b>2</b> .                   | S15         |
| 25 | <b>Table A3:</b> Selected bond angles (°) of complexes <b>1</b> and <b>2</b> .                    | S15-<br>S16 |

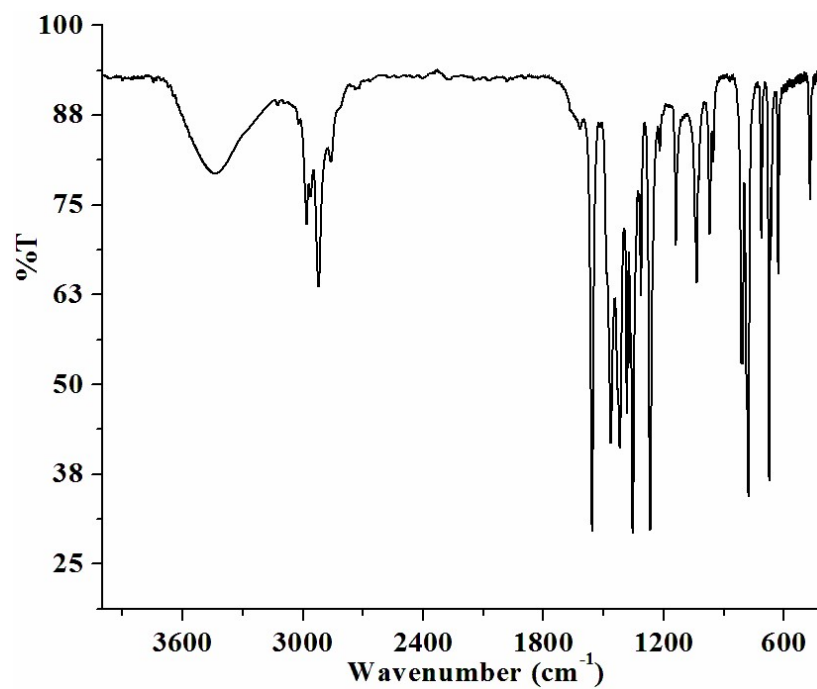

Figure S1. FT-IR spectrum of L in KBr.

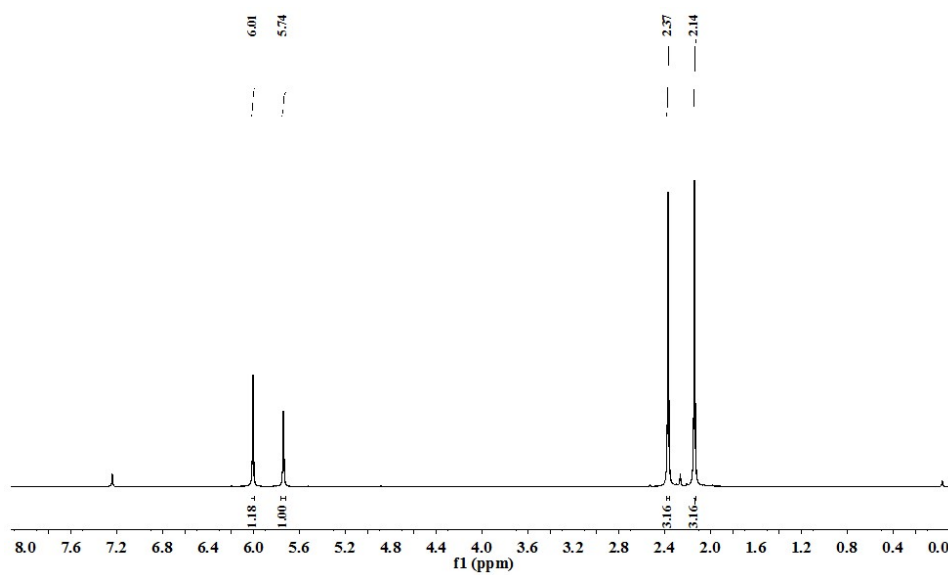

Figure S2.  $^1\text{H}$  NMR spectrum of L in  $\text{CDCl}_3$ .

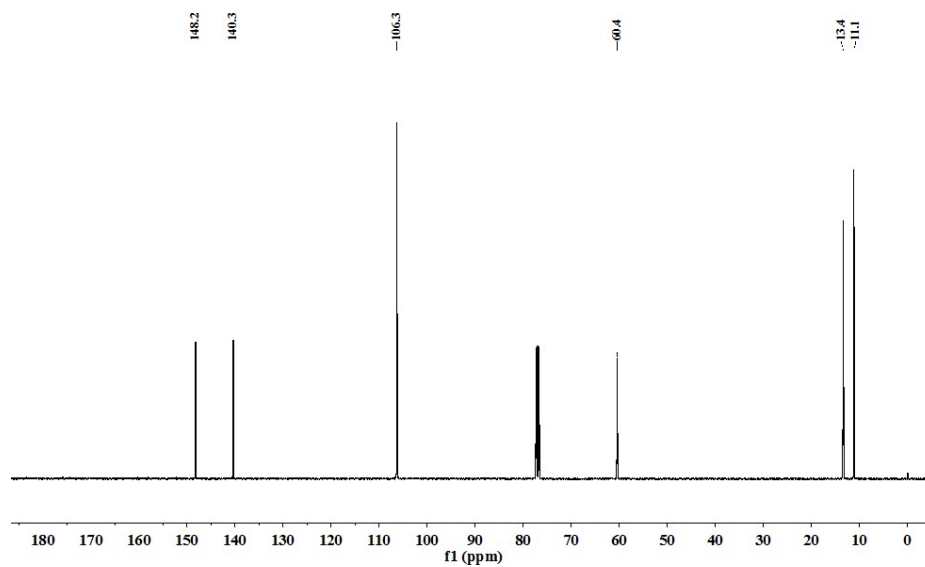

**Figure S3.**  $^{13}\text{C}$  NMR spectrum of L in  $\text{CDCl}_3$ .

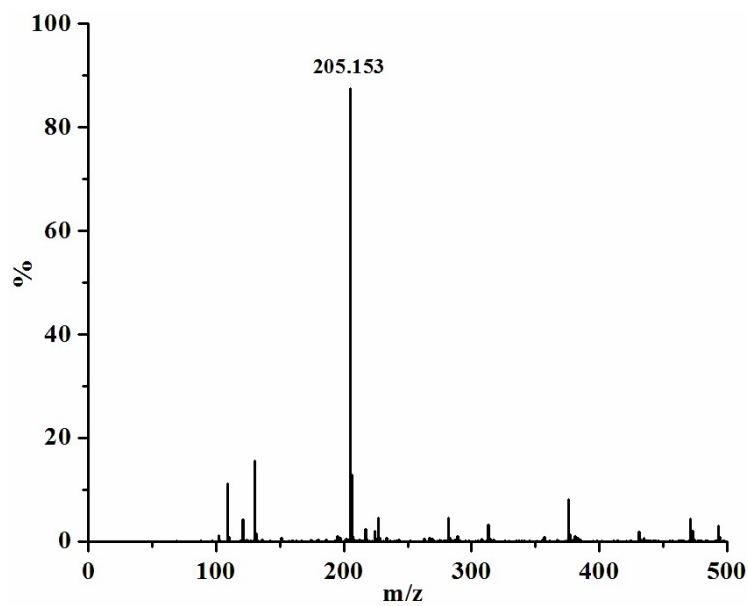

**Figure S4.** ESI-mass spectrum of L in acetonitrile.

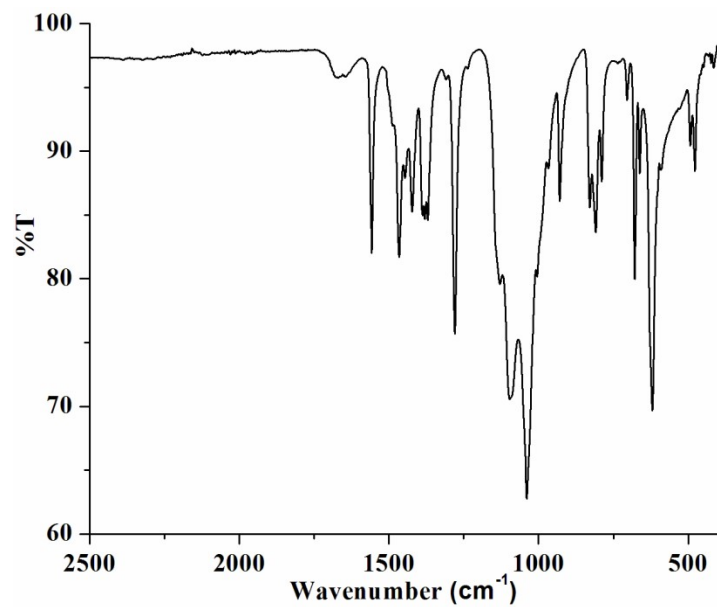

Figure S5. FT-IR spectrum of complex **1** in KBr.

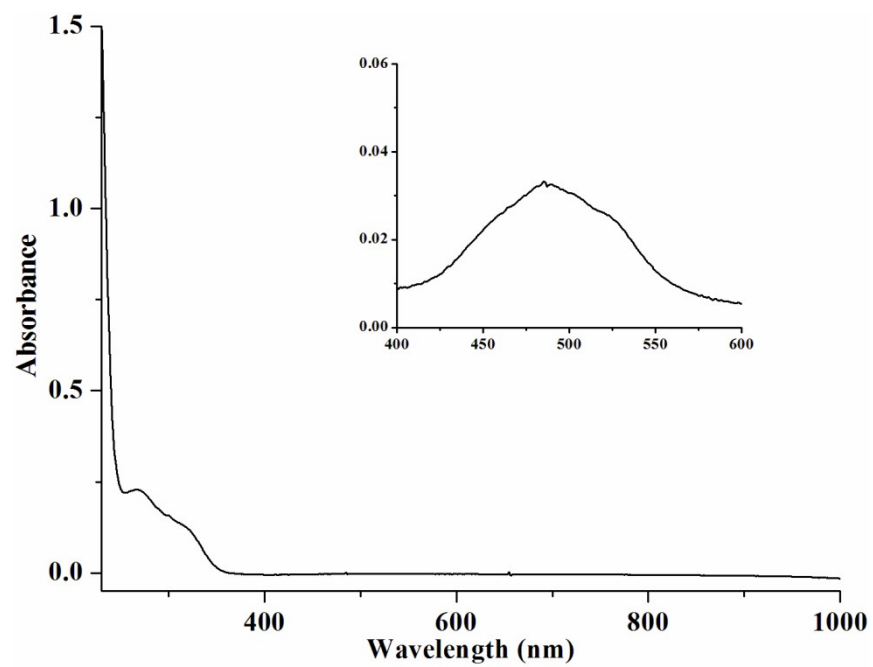

Figure S6. UV-visible spectrum of complex **1** in acetonitrile at room temperature.

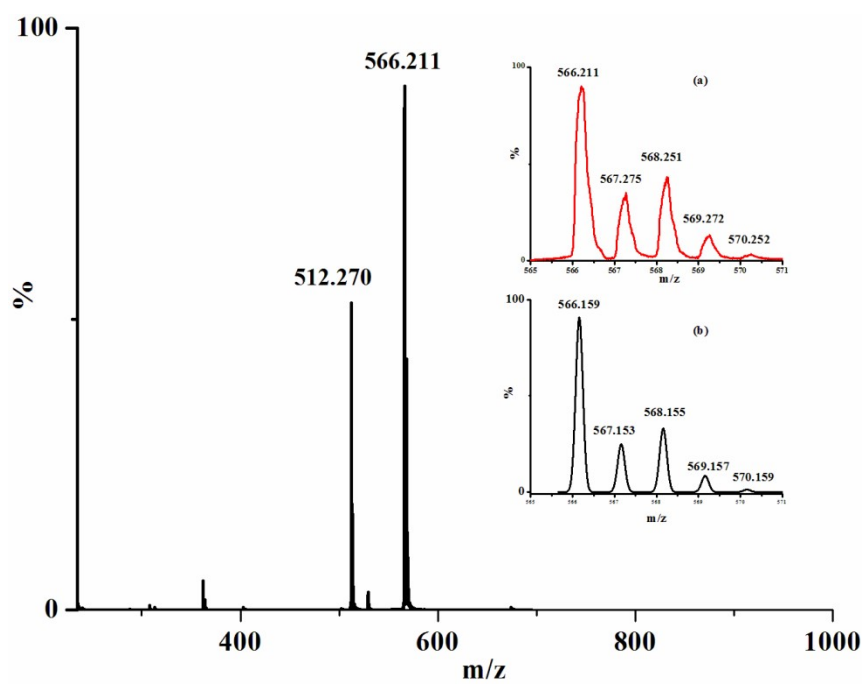

**Figure S7.** ESI-mass spectrum of complex **1** in acetonitrile. [Inset: (a) experimental and (b) simulated isotopic distribution pattern].

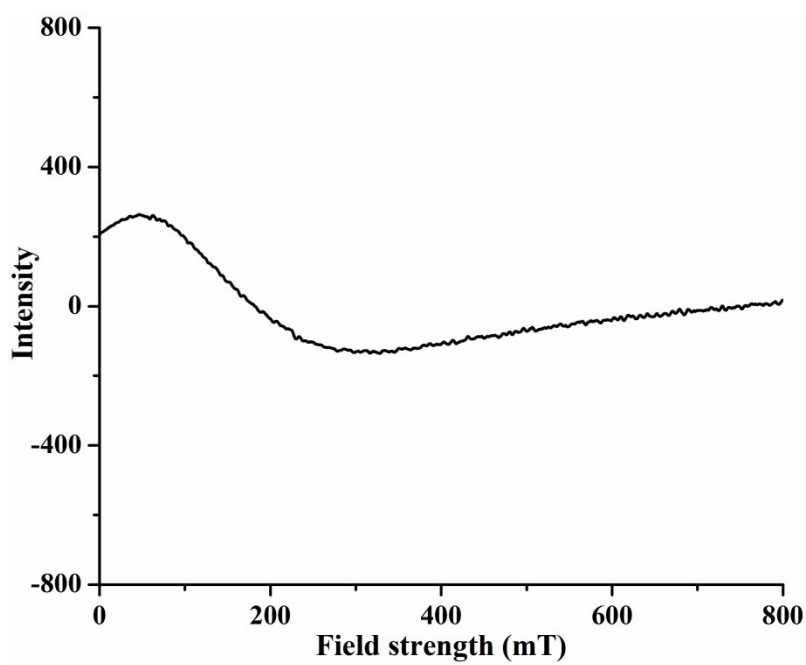

**Figure S8.** X-band EPR spectrum of complex **1** in acetonitrile at 77K.

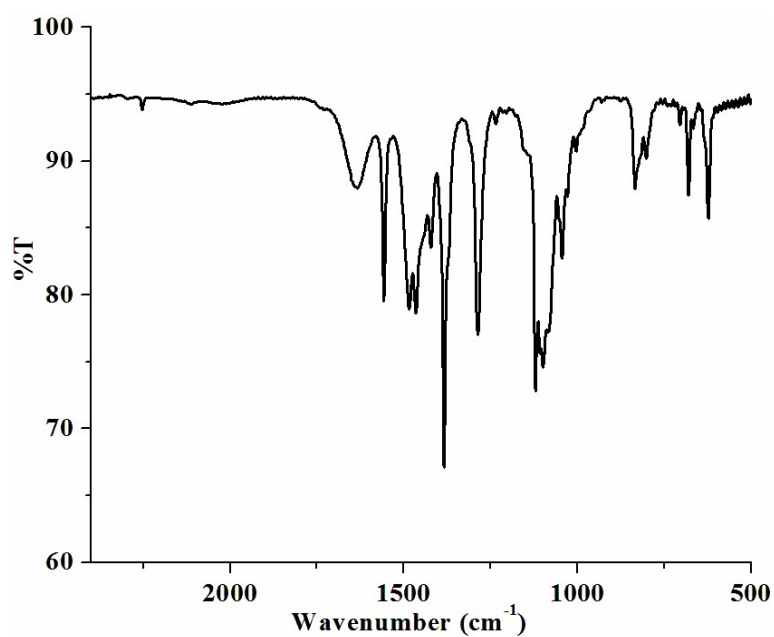

Figure S9. FT-IR spectrum of complex **2** in KBr.

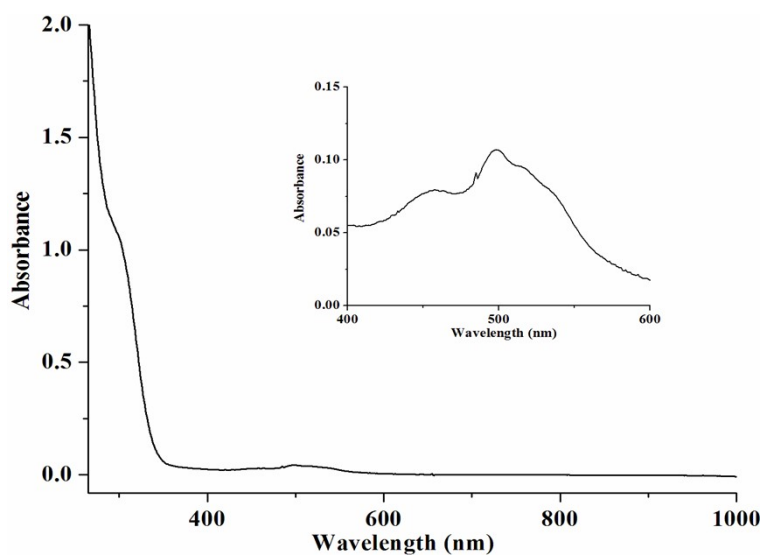

Figure S10. UV-visible spectrum of complex **2** in acetonitrile at room temperature.

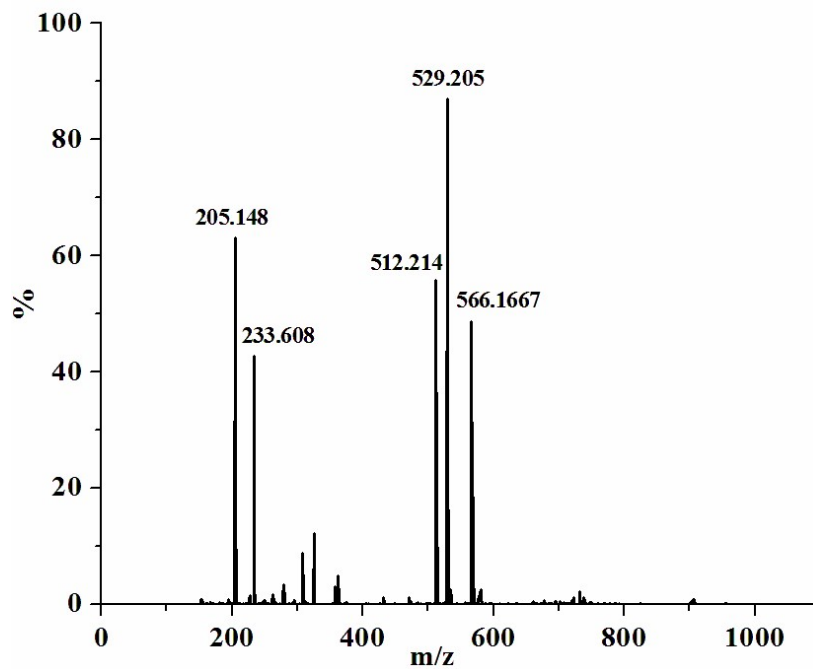

**Figure S11.** ESI-mass spectrum of complex 2 in acetonitrile.

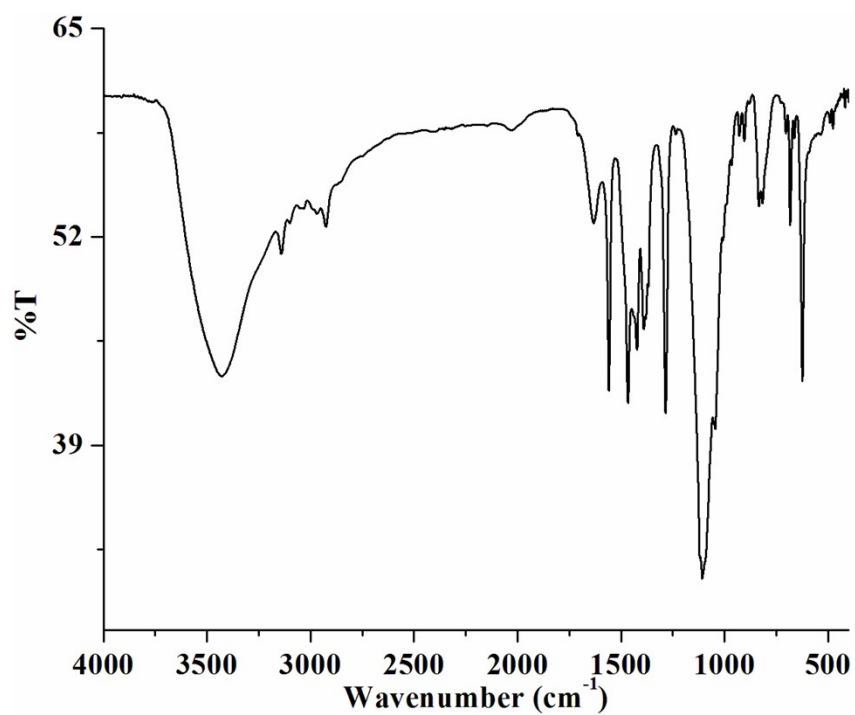

**Figure S12.** FT-IR spectrum of complex 3 in KBr.



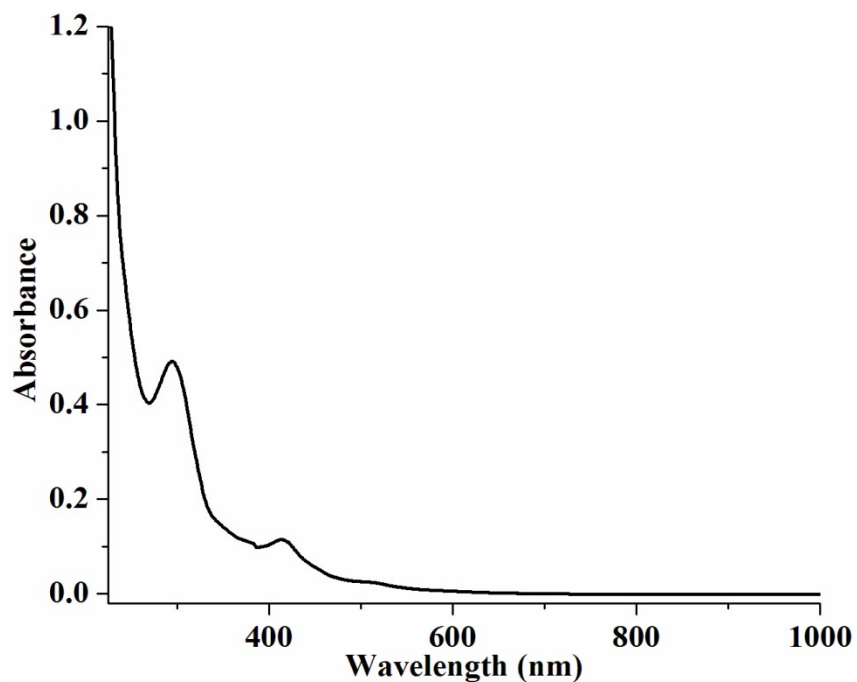

**Figure S13.** UV-visible spectrum of complex **3** in acetonitrile at room temperature.

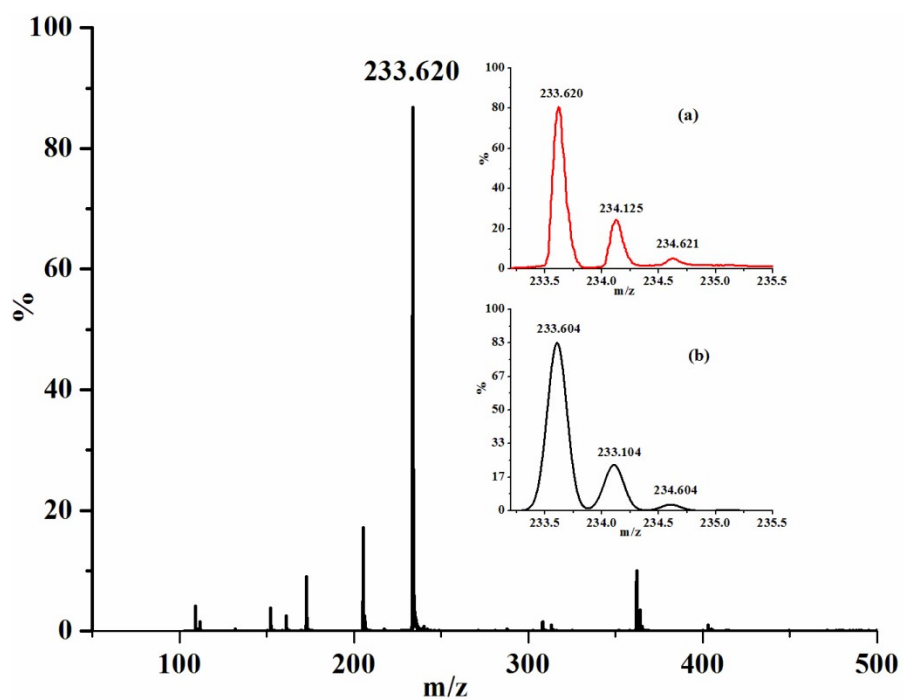

**Figure S14.** ESI-mass spectrum of complex **3** in acetonitrile. [Inset: (a) experimental and (b) simulated isotopic distribution pattern].

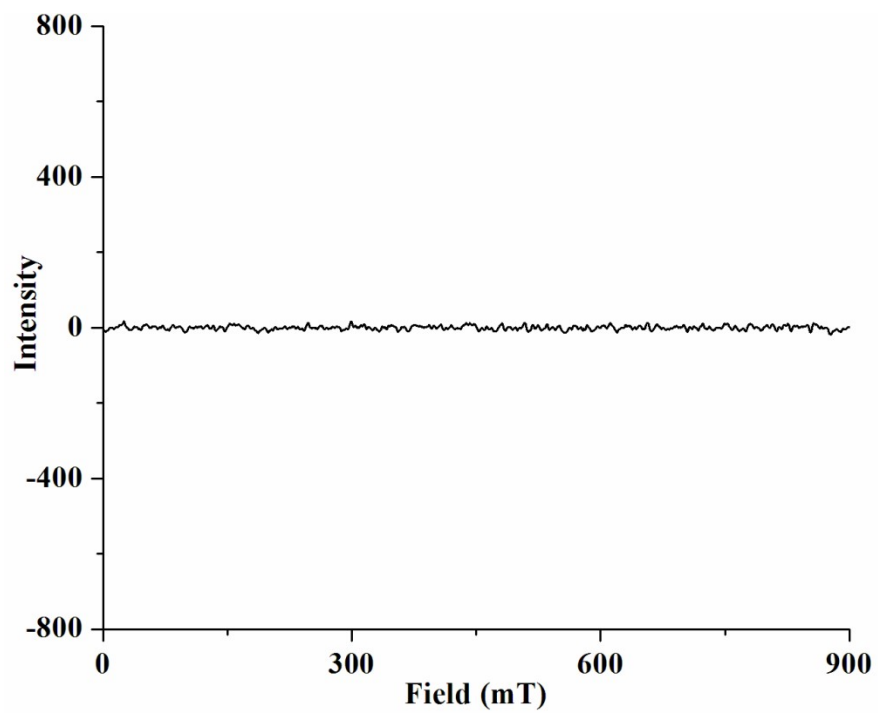

**Figure S15.** X-band EPR spectrum of complex **3** in acetonitrile at 77K.

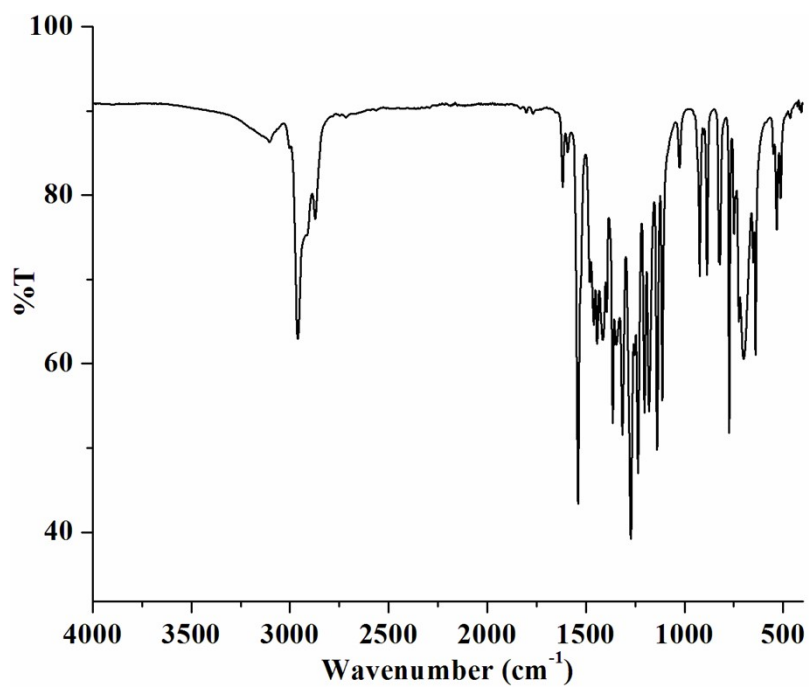

**Figure S16.** FT-IR spectrum of complex **2,4-di-tert-butyl-6-nitrophenol**.

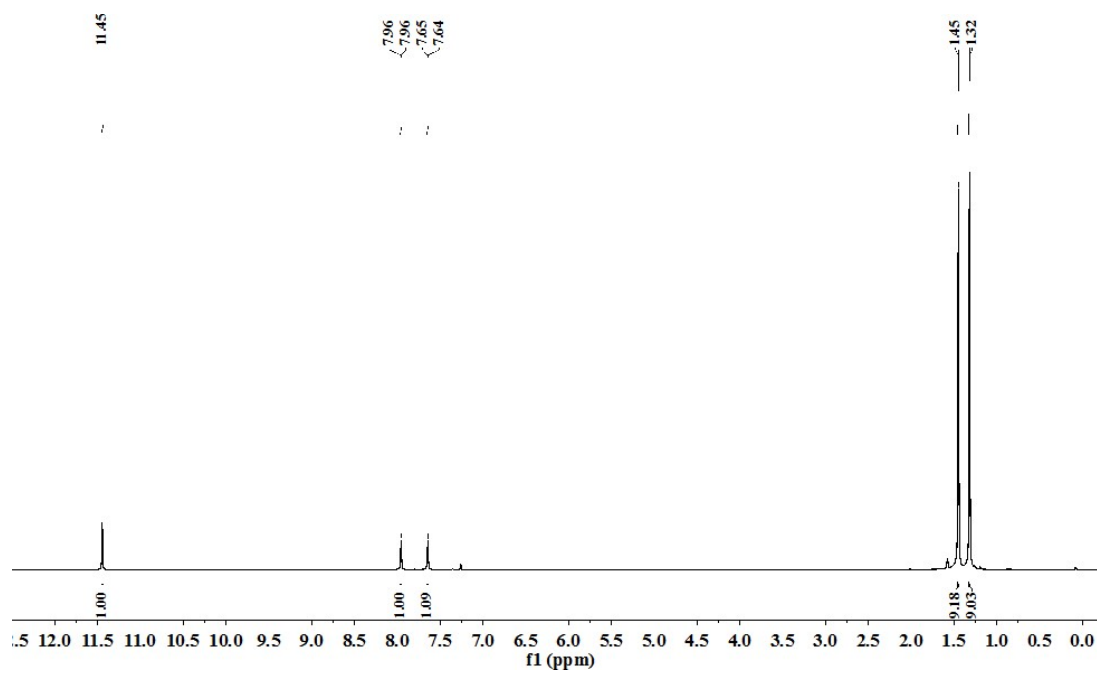

Figure S17.  $^1\text{H}$  NMR spectrum of 2,4-di-*tert*-butyl-6-nitrophenol in  $\text{CDCl}_3$ .

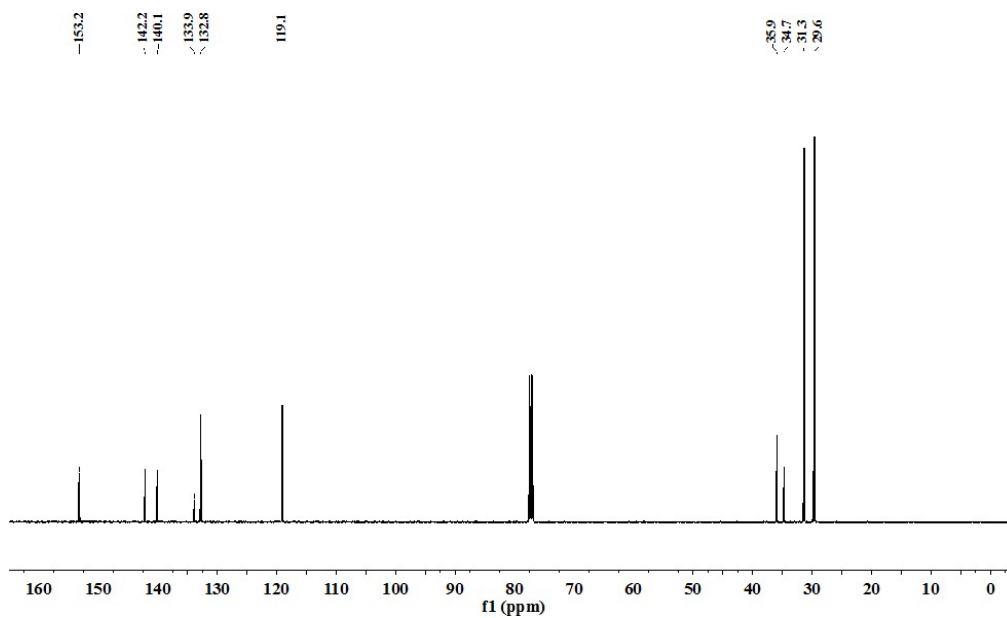

Figure S18.  $^{13}\text{C}$  NMR spectrum of 2,4-di-*tert*-butyl-6-nitrophenol in  $\text{CDCl}_3$ .

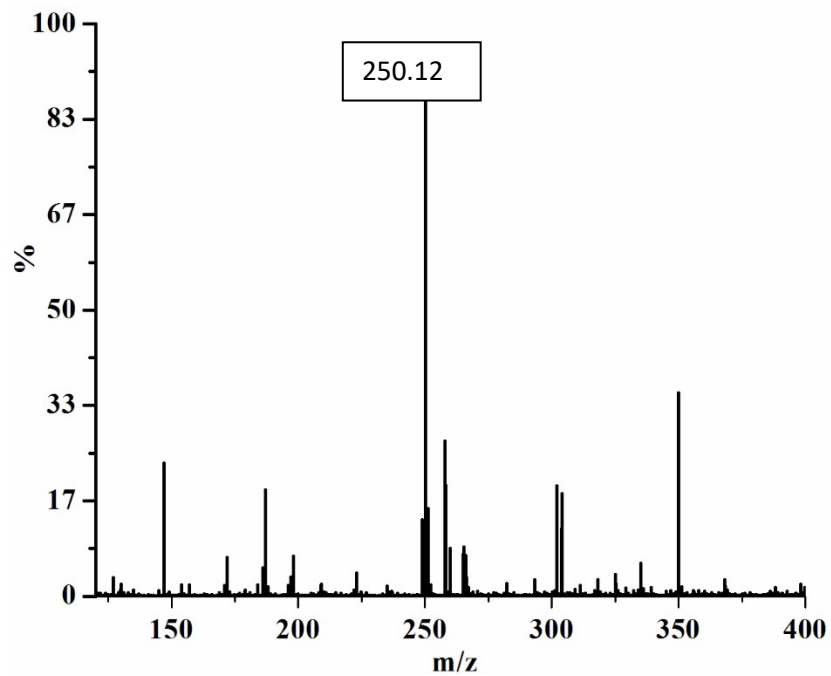

Figure S19. ESI-mass spectrum of 2,4-di-*tert*-butyl-6-nitrophenol in acetonitrile.

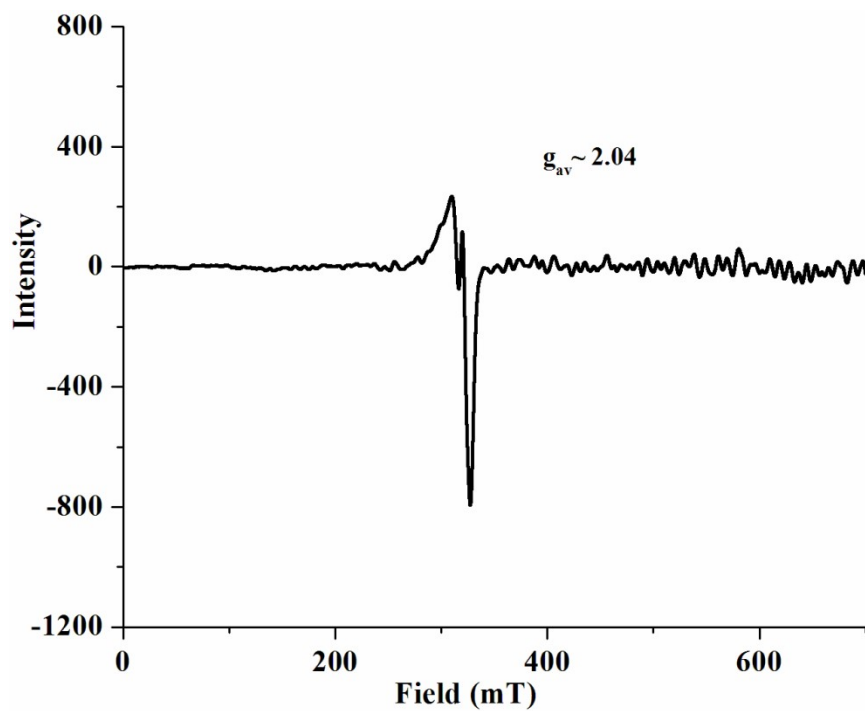

Figure S20. X-band EPR spectrum of Cobalt(II)-hydroxide complex in acetonitrile at 77K.

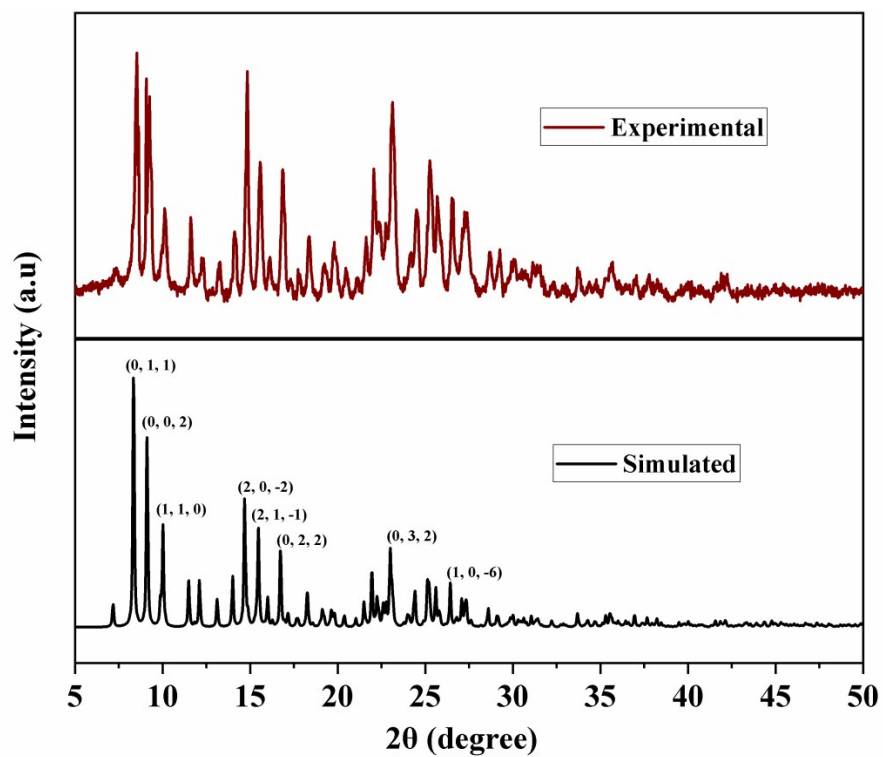

Figure 21. Experimental (red) and Simulated (black) PXRD patterns of complex 1.

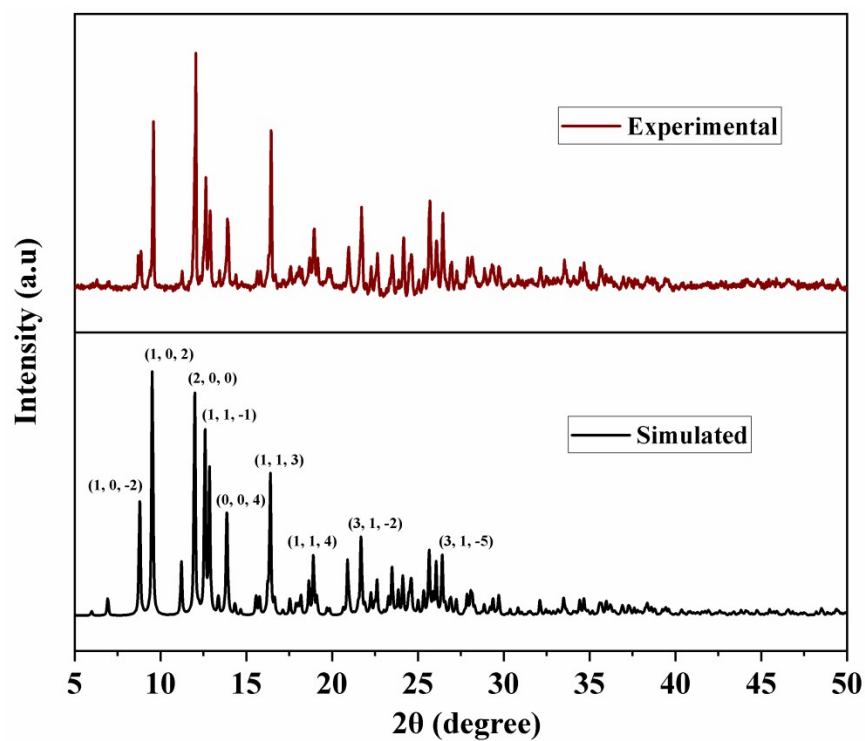

Figure 22. Experimental (red) and Simulated (black) PXRD patterns of complex 2.

**Table A1:** Crystallographic data for complexes **1** and **2**.

|                                | <b>Complex 1</b>                                                                 | <b>Complex 2</b>                                                    |
|--------------------------------|----------------------------------------------------------------------------------|---------------------------------------------------------------------|
| Formulae                       | C <sub>22</sub> H <sub>36</sub> CoN <sub>8</sub> O <sub>10</sub> Cl <sub>2</sub> | C <sub>24</sub> H <sub>35</sub> CoN <sub>10</sub> O <sub>7</sub> Cl |
| Mol. Wt                        | 702.42                                                                           | 670                                                                 |
| Crystal system                 | Monoclinic                                                                       | Monoclinic                                                          |
| Space group                    | P2(1)/c                                                                          | P2(1)/c                                                             |
| Temperature/K                  | 296                                                                              | 296                                                                 |
| Wavelength/Å                   | 0.71073                                                                          | 0.71073                                                             |
| a/ Å                           | 12.8427(6)                                                                       | 14.7963(8)                                                          |
| b/ Å                           | 12.6406(6)                                                                       | 8.2883(4)                                                           |
| c/ Å                           | 20.2239(9)                                                                       | 25.5819(13)                                                         |
| α/                             | 90                                                                               | 90.00                                                               |
| β/                             | 106.4850(10)                                                                     | 94.607(2)                                                           |
| γ/                             | 90                                                                               | 90.00                                                               |
| V/ Å <sup>3</sup>              | 3148.2(3)                                                                        | 3127.1(3)                                                           |
| Z                              | 4                                                                                | 4                                                                   |
| Density/Mgm <sup>-3</sup>      | 1.482                                                                            | 1.423                                                               |
| Abs. Coeff. /mm <sup>-1</sup>  | 0.778                                                                            | 0.692                                                               |
| Abs. Correction                | Multi-scan                                                                       | Multi-scan                                                          |
| F(000)                         | 1460.0                                                                           | 1396.0                                                              |
| Total no. of reflections       | 5534                                                                             | 5508                                                                |
| Reflections. $I > 2\sigma(I)$  | 4352                                                                             | 4464                                                                |
| Max. 2θ/                       | 24.999                                                                           | 24.999                                                              |
| Ranges (h, k, l)               | -15 ≤ h ≤ 15<br>-15 ≤ k ≤ 15<br>-24 ≤ l ≤ 24                                     | -17 ≤ h ≤ 17<br>-9 ≤ k ≤ 9<br>-30 ≤ l ≤ 30                          |
| Complete to 2θ (%)             | 99                                                                               | 100                                                                 |
| Refinement method              | Full-matrix least-squares on $F^2$                                               | Full-matrix least-squares on $F^2$                                  |
| Goof( $F^2$ )                  | 1.013                                                                            | 1.102                                                               |
| R indices [ $I > 2\sigma(I)$ ] | 0.0560                                                                           | 0.0532                                                              |
| R indices (all data)           | 0.0736                                                                           | 0.0703                                                              |
| Residual electron density      | 0.73                                                                             | 0.54                                                                |

**Table A2:** Selected bond lengths (Å) of complexes **1** and **2**.

| <b>Atoms</b> | <b>Complex 1</b> | <b>Complex 2</b> |
|--------------|------------------|------------------|
| Co1-N1       | 2.136(3)         | 2.106(3)         |
| Co1-N4       | 2.130(3)         | 2.116(3)         |
| Co1-N5       | 2.118(3)         | 2.100(3)         |
| Co1-N8       | 2.126(3)         | 2.110(3)         |
| Co1-O1       | 2.206(3)         | 2.217(2)         |
| Co1-O2       | 2.180(3)         | 2.192(2)         |
| N1-N2        | 1.362(4)         | 1.368(4)         |
| N3-N4        | 1.370(4)         | 1.364(4)         |
| N2-C6        | 1.441(5)         | 1.446(4)         |
| N3-C6        | 1.447(5)         | 1.447(4)         |
| N9-O1        | -                | 1.260(4)         |
| N9-O2        | -                | 1.263(3)         |
| N9-O3        | -                | 1.228(4)         |

**Table A3:** Selected bond angles (°) of complexes **1** and **2**.

| <b>Atoms</b> | <b>Complex 1</b> | <b>Complex 2</b> |
|--------------|------------------|------------------|
| N1-Co1-O1    | 88.36(12)        | 160.14(10)       |
| N1-Co1-O2    | 88.84(13)        | 101.85(10)       |
| N1-Co1-N4    | 88.70(12)        | 88.66(10)        |
| N1-Co1-N8    | 175.87(13)       | 97.09(11)        |
| N1-Co1-N5    | 93.33(12)        | 96.66(11)        |
| N4-Co1-N5    | 91.48(13)        | 95.73(11)        |
| N4-Co1-N8    | 95.23(12)        | 172.38(11)       |
| N4-Co1-O1    | 172.64(12)       | 87.90(10)        |
| N4-Co1-O2    | 93.62(14)        | 86.22(10)        |
| N1-C2-C1     | 122.5(4)         | 122.6(3)         |
| N1-C2-C3     | 109.6(4)         | 109.2(3)         |
| N1-N2-C4     | 111.6(3)         |                  |
| N2-C4-C3     | 105.7(4)         | 106.5(3)         |
| N2-C4-C5     | 123.0(4)         | 123.2(4)         |
| N1-N2-C6     | 119.5(3)         | 118.6(3)         |
| N2-C6-N3     | 111.2(3)         | 110.7(3)         |
| N4-N3-C6     | 119.1(3)         | 118.2(3)         |

|           |          |            |
|-----------|----------|------------|
| N2-N1-Co1 | 118.7(2) | 120.0(2)   |
| N3-N4-Co1 | 119.7(2) |            |
| C2-C3-C4  | 107.5(4) |            |
| C1-C2-C3  | 127.9(4) |            |
| N5-Co1-N8 |          | 88.59(11)  |
| N5-Co1-O2 |          | 161.44(10) |
| N1-Co1-O2 |          | 101.85(10) |
| N8-Co1-O2 |          | 87.70(10)  |
| N4-Co1-O2 |          | 87.90(10)  |
| N8-Co1-O1 |          | 85.00(10)  |
| O2-Co1-O1 |          | 58.41(9)   |
| O1-N9-O3  |          | 121.8(3)   |
| O2-N9-O3  |          | 121.2(3)   |
| O1-N9-O2  |          | 117.0(3)   |
